# Supplementary material
Source: PubMed Central journal article supplement (PMC7415994)
Supplement: supp_RA120.012962_158497_3_supp_546168_qbqm5b.pdf [file supp_RA120.012962_158497_3_supp_546168_qbqm5b.pdf]

**Supplemental Information for:**

**Dysfunctional telomeres trigger cellular senescence mediated by cyclic GMP-AMP synthase**

Salim Abdisalaam<sup>#,1</sup>, Souparno Bhattacharya<sup>#,1</sup>, Shibani Mukherjee<sup>#,1</sup>, Debapriya Sinha<sup>1</sup>, Kalayarasan Srinivasan<sup>1</sup>, Mingrui Zhu<sup>2</sup>, Esra A. Akbay<sup>2</sup>, Hesham A. Sadek<sup>3</sup>, Jerry W. Shay<sup>4</sup> and Aroumougame Asaithamby<sup>\*,1</sup>

<sup>1</sup>Department of Radiation Oncology, University of Texas Southwestern Medical Center, Dallas, TX 75390, USA

<sup>2</sup>Department of Pathology, University of Texas Southwestern Medical Center, Dallas, TX 75390, USA

<sup>3</sup>Department of Internal Medicine, University of Texas Southwestern Medical Center, Dallas, TX 75390, USA

<sup>4</sup>Department of Cell Biology, University of Texas Southwestern Medical Center, Dallas, TX 75390, USA

<sup>#</sup>Co-first authors

\*Corresponding author: Aroumougame Asaithamby (aka Thambi)  
E-mail: Asaithamby.Aroumougame@UTSouthwestern.edu

**Running Title:** cGAS-activation by dysfunctional telomeres

**Key Words:** cyclic GMP-AMP synthase (cGAS); micronuclei; genome maintenance

This file includes:

Figures S1-S3

Tables T1-T3

## Supplementary figure legends

**Figure S1: Telomeric DNA-targeted DSBs (T-DSBs) trigger innate immune signaling but not telomere shortening in response to T-DSBs. A-C.** Telomeric DSBs trigger innate immune signaling in U2OS cells. Bar graph shows frequency of micronuclei formation at 48 h after the induction of telomeric DSBs (A). Western blot shows increased activation of IRF3 (B), and the bar graph shows increased expression of immune pathway genes (C) in U2OS cells stably co-expressing DD-Cas9 and sgTelomere RNA at different time intervals. Bar graph presents the mean and STDEV from two independent experiments. w/d-withdrawal; M-mock. Statistical analyses were performed using student's t-test (A) and two-way ANOVA (C). **D.** Bar graph shows a major fraction of DSBs induced by sgTelomere+DD-Cas9 is localized in the telomeric region. U2OS cells stably co-expressing DD-Cas9 and sgTelomere RNA were treated with doxycycline and Shield1 for 24 hours, protein-DNA complex was cross-linked with 4% paraformaldehyde and the chromatin fraction was co-immunoprecipitated using anti- $\gamma$ H2AX antibodies. The purified genomic DNA was subjected to next-generation sequencing (NGS) and the NGS was then used to enumerate the percentage of telomeric DNA enrichment in in sgTelomere+DD-Cas9 cells. Briefly, Bowtie2's build command was used to index the latest release of human reference genome (Homo Sapiens Genome Reference Consortium Human Build 38; GRCh38), downloaded from the University of California, Santa Cruz (UCSC). The indexed reference genome was used to align the raw sequencing fastq reads using Bowtie2 to create an aligned .sam file. The .sam file was then binarized into .bam using Samtools view command. The .bam files were then sorted and indexed using Samtools sort and index command, respectively. The indexed bam files were created for ease of visualization. These steps were performed for all datasets, including T0, Mock and Input. Finally, Model-based analysis for ChIP-Sequence (MACS2) was used for calling significant peaks using Input as the control data. The commands used for the data analysis are: 1. Bowtie2-build hg38.fa Indices/hg38 (Indexing using Bowtie2); 2. Bowtie2 -x Indices/hg38 -U T0\_24hrdoxy.fastq.gz -S T0\_24hrdoxy.sam (aligning using Bowtie2); 3. Samtools view -bSo T0\_24hrdoxy.bam T0\_24hrdoxy.sam (Binarizing sam output file); 4. Samtools sort T0\_24hrdoxy.bam -o T0\_24hrdoxy.sorted.bam and Samtools index T0\_24hrdoxy.sorted.bam (sorting and indexing); 5. MACS2 callpeak -t T0\_24hrdoxy.sorted.bam -c input.sorted.bam --format=BAM --name=DoxyT0cas9 --gsize=2913022398 (Peak calling). The average signal enrichment scores above 750 in a given genomic region was used for calculating the percentage of telomere peaks in total number of peaks detected by the MACS2. **E.** Telomeric DSBs do not cause telomere shortening. Representative gel images show distribution of differently sized telomeres in HT1080 cells co-expressing DD-Cas9 and sgTelomere RNA in mock-treated and 1-7 days after DOX and Shield1 treatment (Ei). Bar graph shows mean length of telomeres in mock- and DOX+Shield1-treated HT1080+sgTelomere+DD-Cas9 cells at indicated time points (Eii). M-DNA marker.

**Figure S2: Cellular senescence caused by dysfunctional telomeres is different from normal physiological senescence. A.** Schematics of the experimental design used in panels B-E, illustrating treatment of hTERT immortalized human skin fibroblasts

(82-6) with 6-thio-dG; T-hours, D-days. **B.** Induction of dysfunctional telomeres in hTERT immortalized human skin fibroblasts generates micronuclei at 72 h after 10  $\mu$ M 6-thio-dG withdrawal. Bar graph presents the mean and STDEV from three independent experiments. **C.** Induction of dysfunctional telomeres in hTERT immortalized human skin fibroblasts activates IRF3 and STAT1 at different time intervals after 10  $\mu$ M 6-thio-dG withdrawal. **D.** Induction of dysfunctional telomeres in hTERT immortalized human skin fibroblasts show elevated expression of immune signaling genes 72 h after 6-thio-dG withdrawal. Data in the bar graph present the mean and STDEV from two-three independent experiments. **E.** Fibroblasts show increased levels of premature senescence phenotype 15 days after the withdrawal of 10  $\mu$ M 6-thio-dG. Data in the bar graph present the mean and STDEV from 10 fields from 3-6 independent experiments. **F-H.** Replicative senescence is independent of immune signaling activation. Graph shows frequency of  $\beta$ -gal staining in IMR90 cells undergoing replicative senescence (**F**). Data in the bar graph present the mean and STDEV from two independent experiments. Graph shows frequency of micronuclei formation in young and aged IMR90 cells (**G**). Data in the bar graph present the mean and STDEV from 20-30 fields from three independent experiments. Graph shows expression of innate immune pathway genes (**H**) in IMR90 cells undergoing replicative senescence. Data in the bar graph present the mean and STDEV from two independent experiments. Statistical analyses were performed using student's t-test (B, E, F, G and H) and two-way ANOVA (D).

**Figure S3: Dysfunctional telomeres cause marginal cell death.** **A.** Induction of telomeric DSBs does not cause apoptosis. Western blot shows expression of total and cleaved caspase 3 (a well-known marker for apoptosis) at different time intervals after Doxycycline and Shield1 treatment in HT1080 cells co-expressing DD-Cas9 and sgTelomere RNA. HT1080 cells treated with 2  $\mu$ M camptothecin (CPT) continuously for 24 h were used as a positive control for apoptosis. U-untreated. **B.** 6-thio-dG treatment has a marginal effect on cell survival. Cell survival was analyzed by a colony formation assay. Bar graph shows the proportion of surviving HT1080 cells 7 days after 3  $\mu$ M 6-thio-dG treatment relative to DMSO-treated cells. The relative survival efficiencies were plotted. The error bars represent the STDEV calculated from triplicate experimental setup.

### Supplementary Tables

**Table S1:** List of primers used for cloning full length and truncated cDNAs reported in this study.

**Table S2:** List of primary antibodies and their respective dilutions used for both western blotting (WB) and immunofluorescence staining (IF) reported in this study.

**Table S3:** List of primers used for quantitative real-time polymerase chain reaction reported in this study.

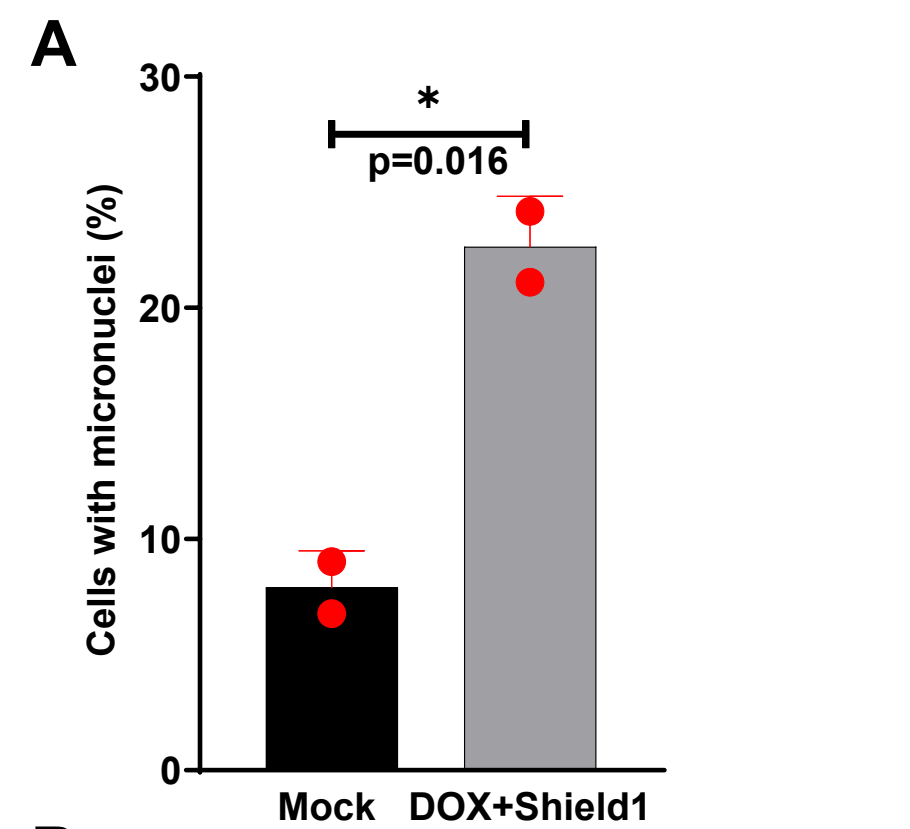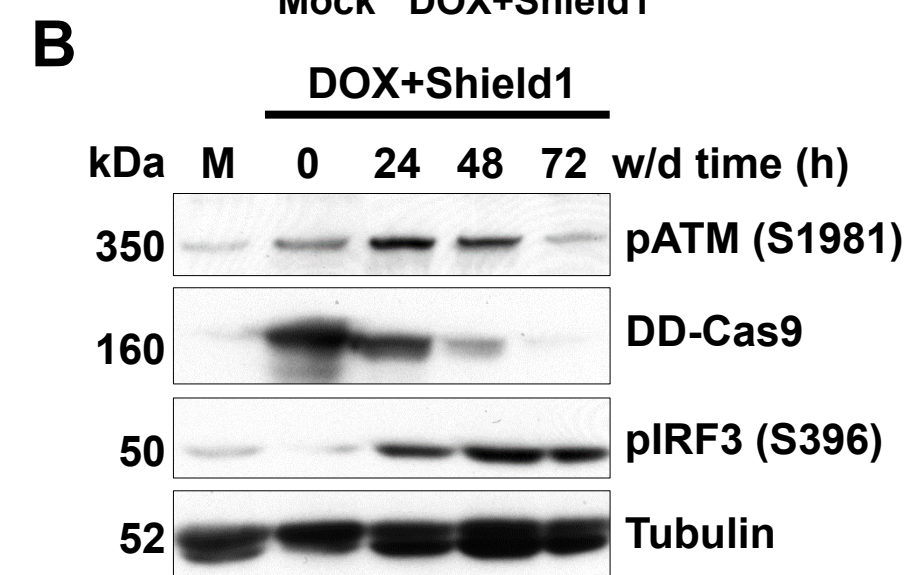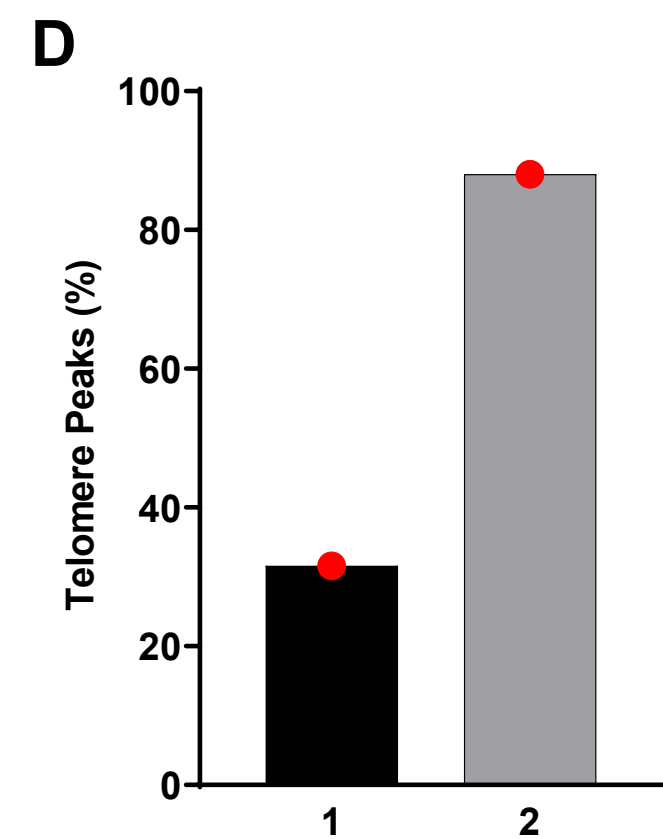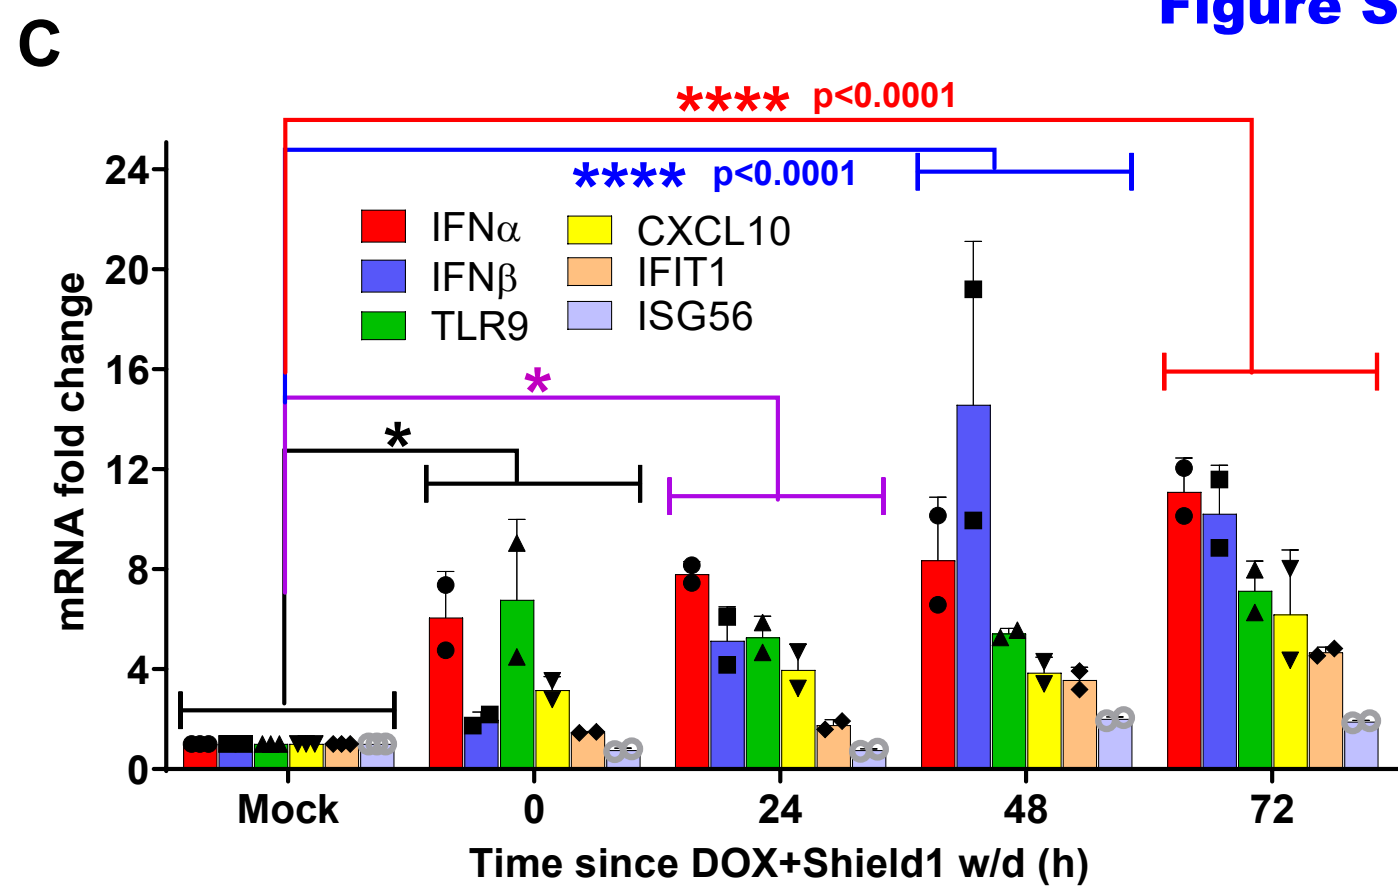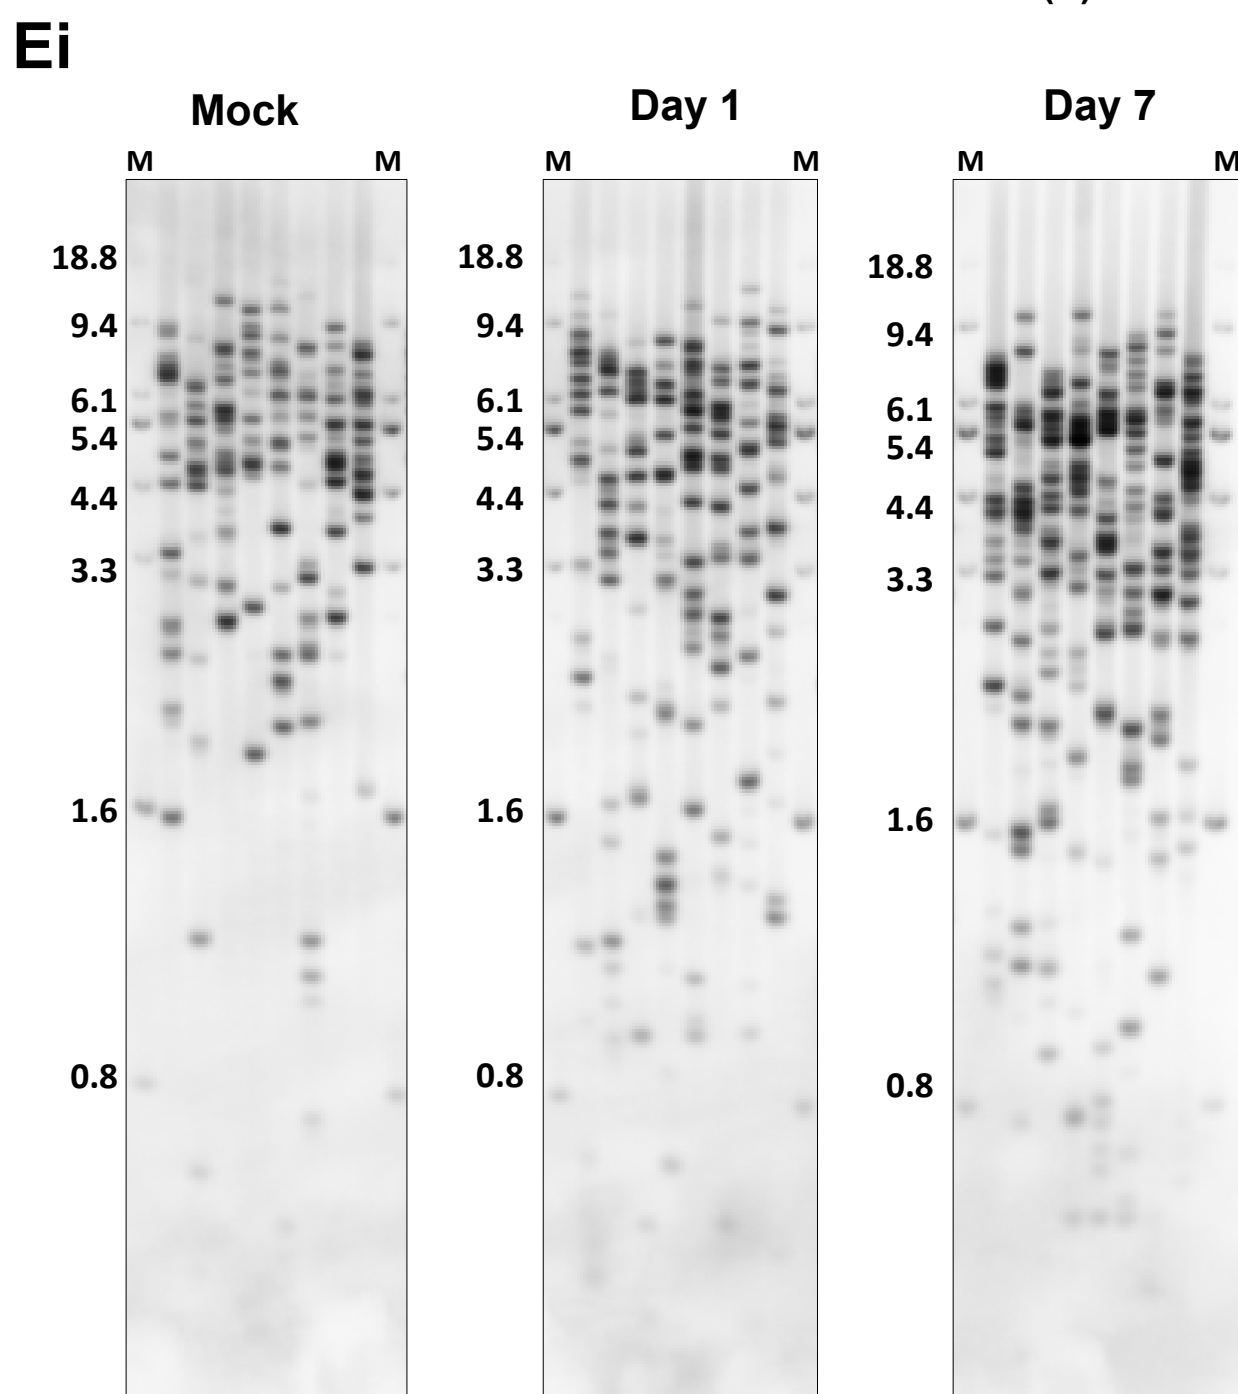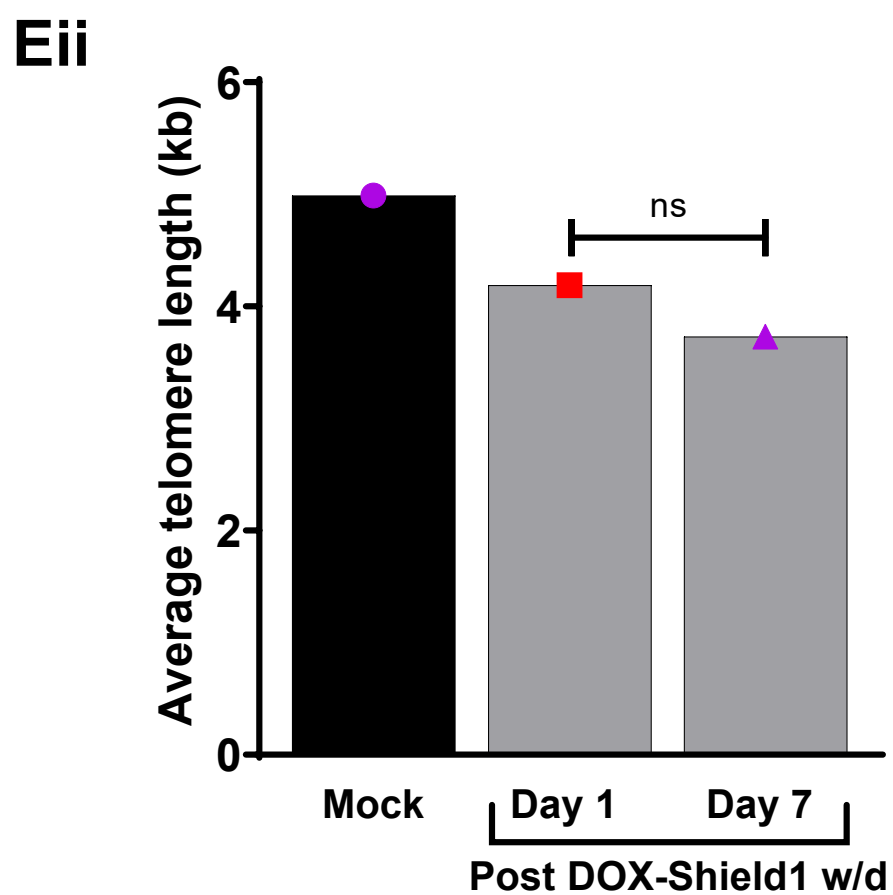

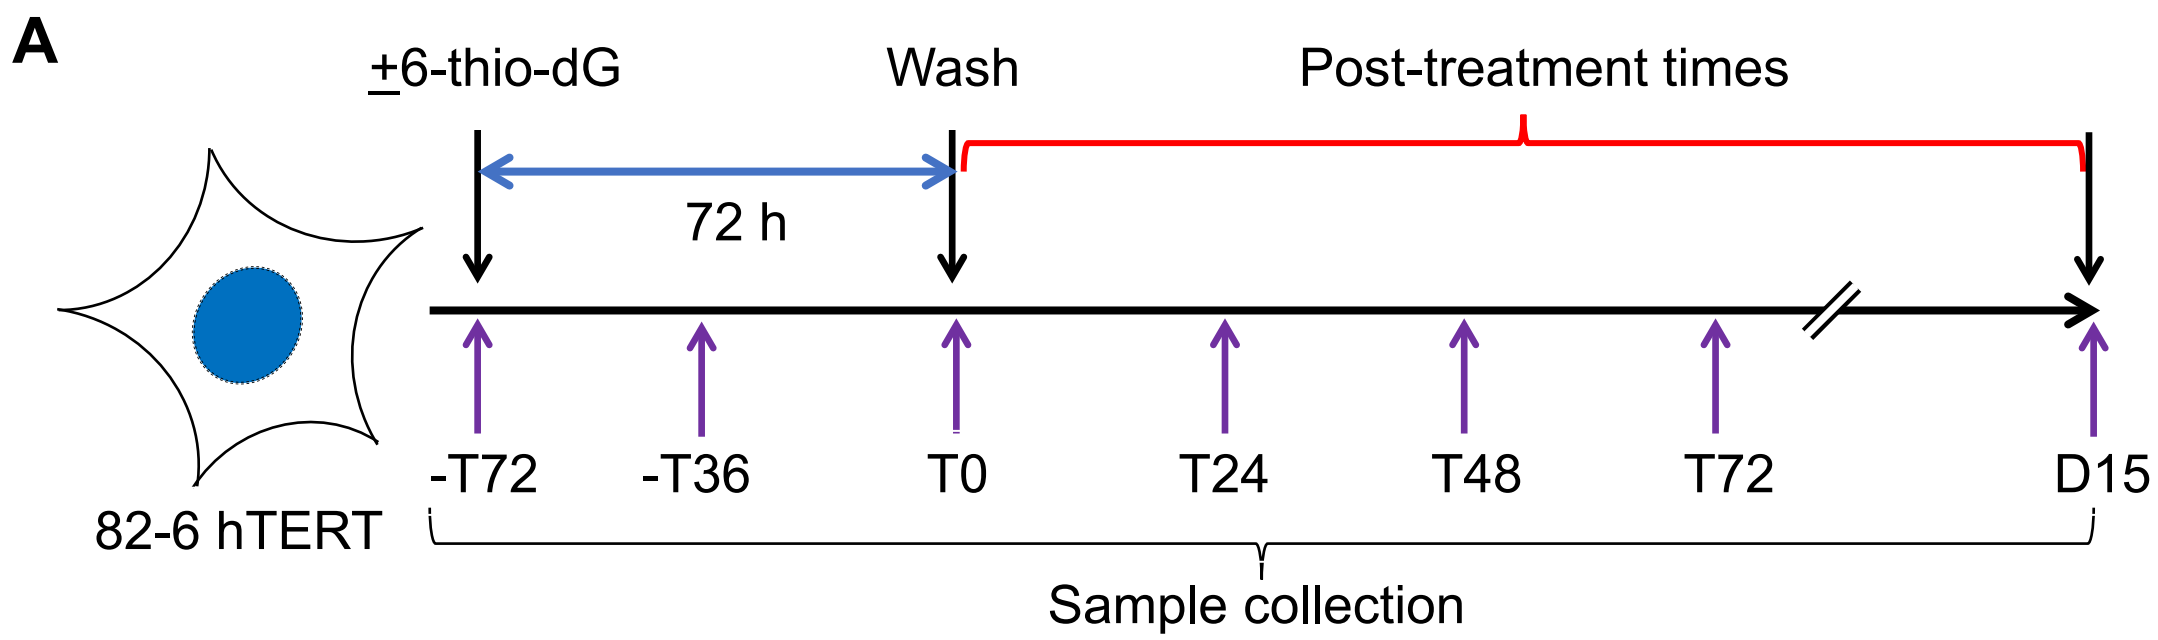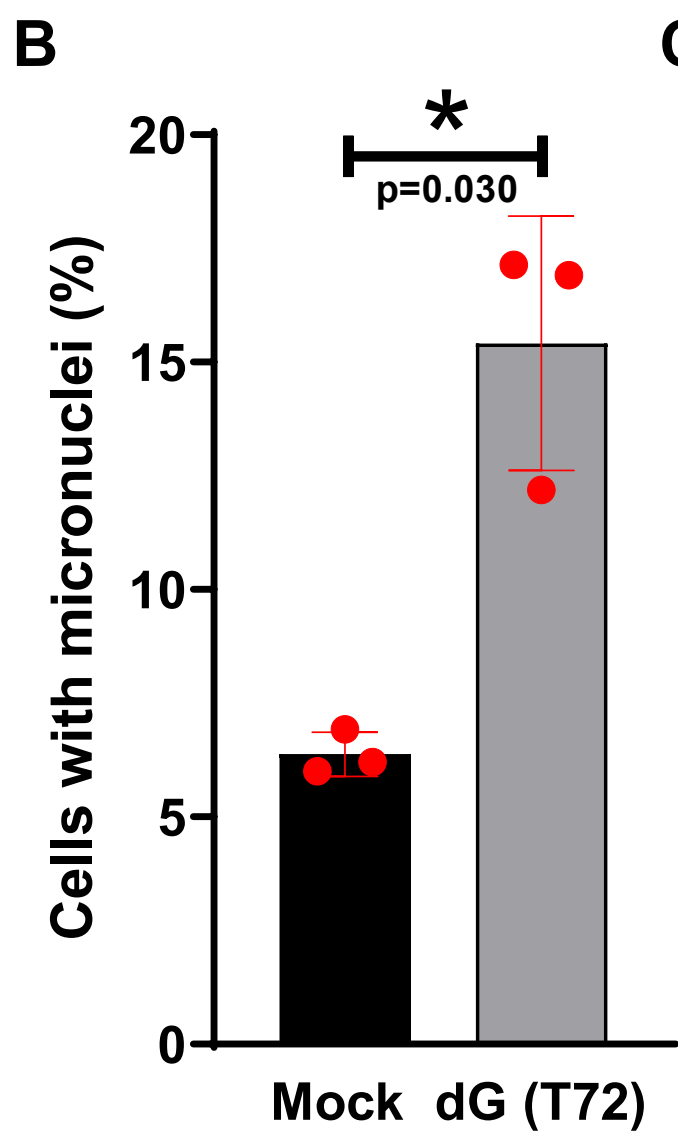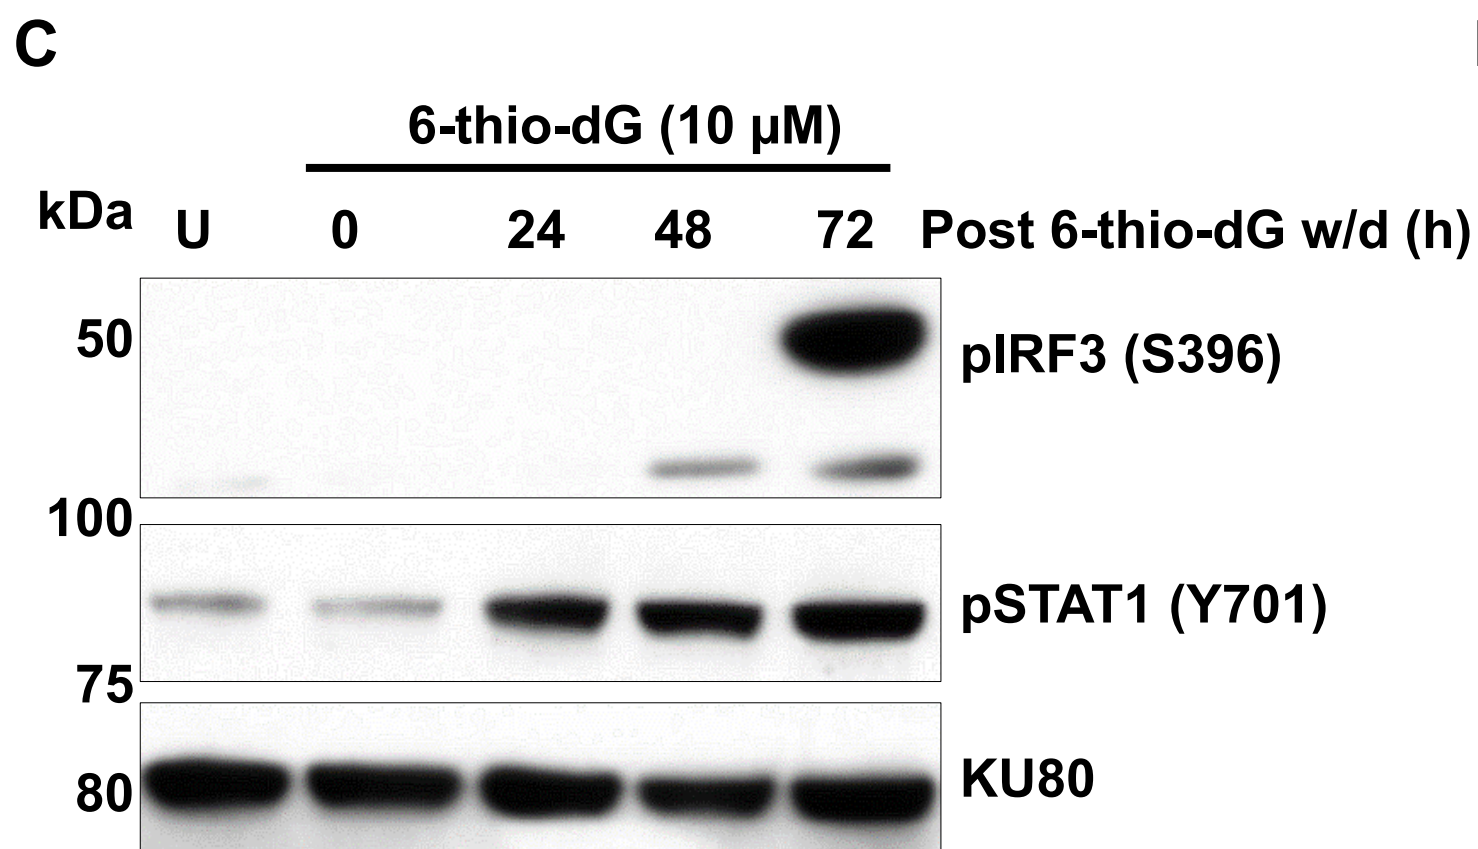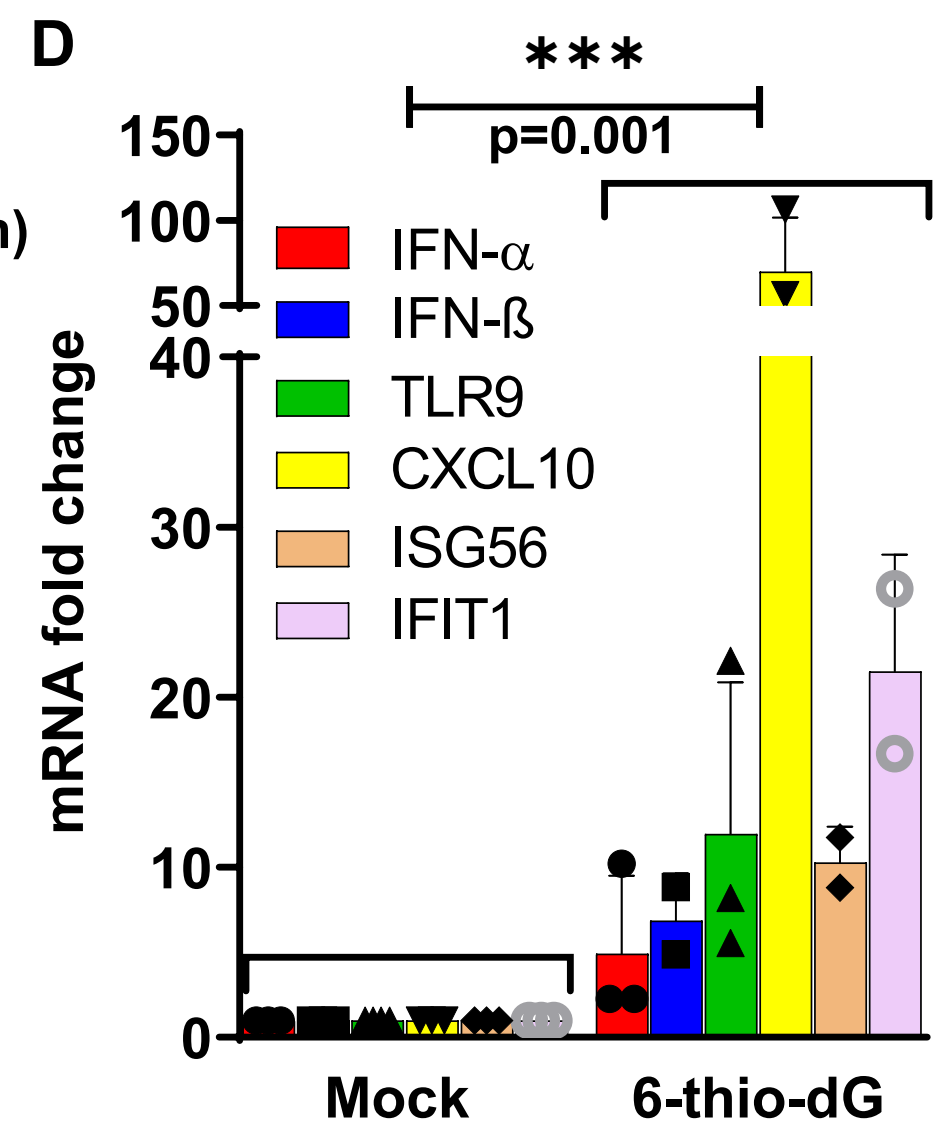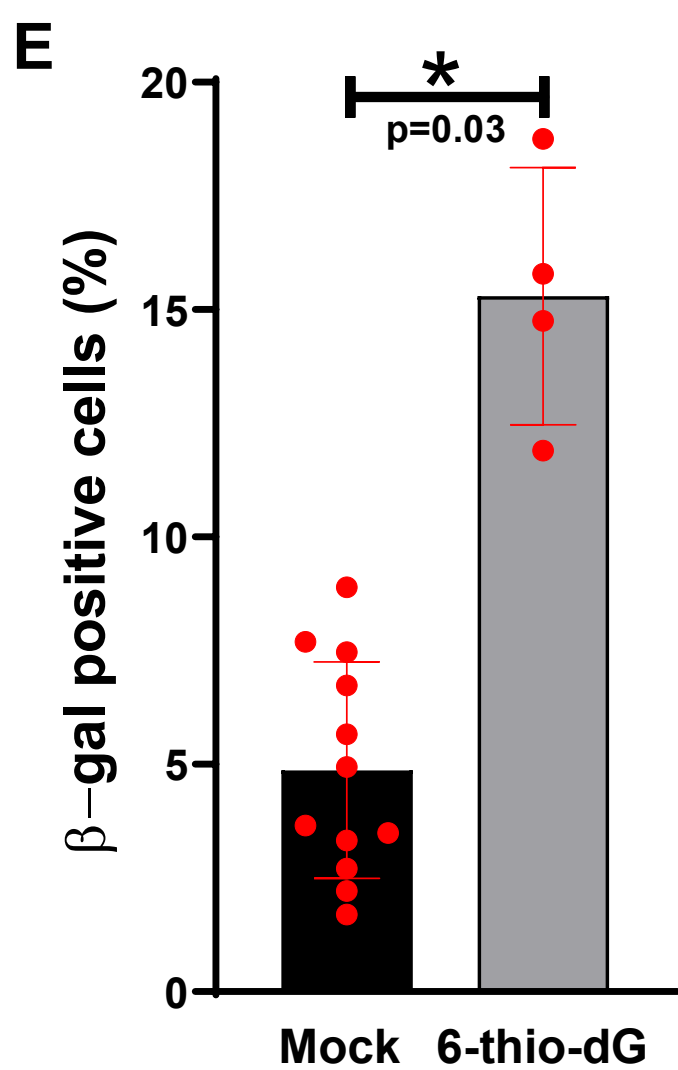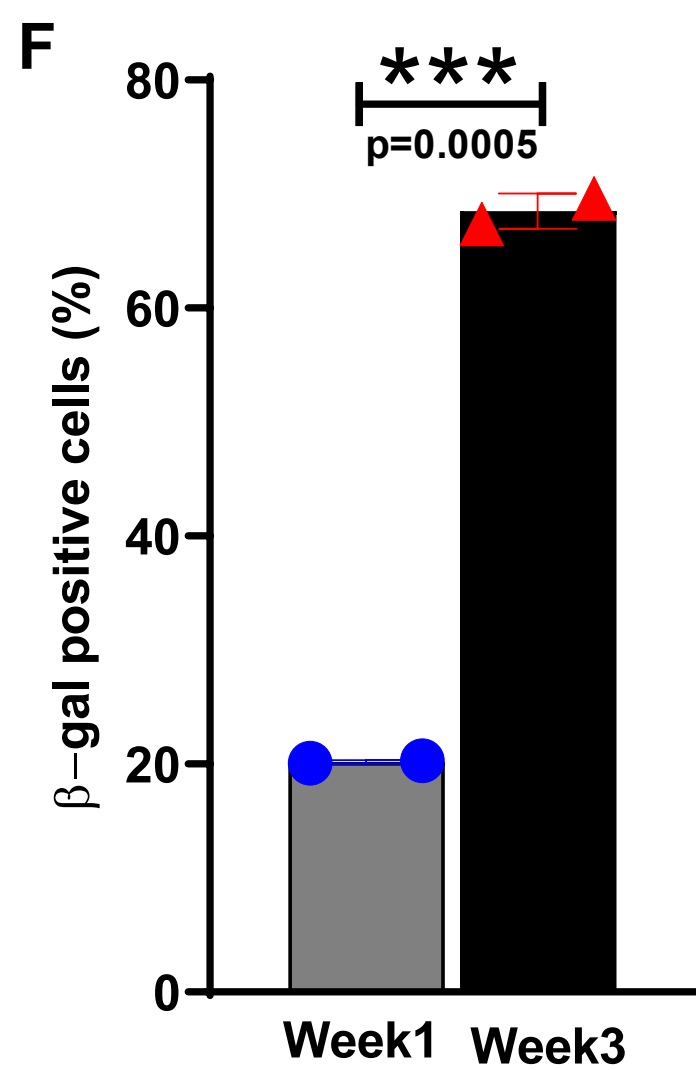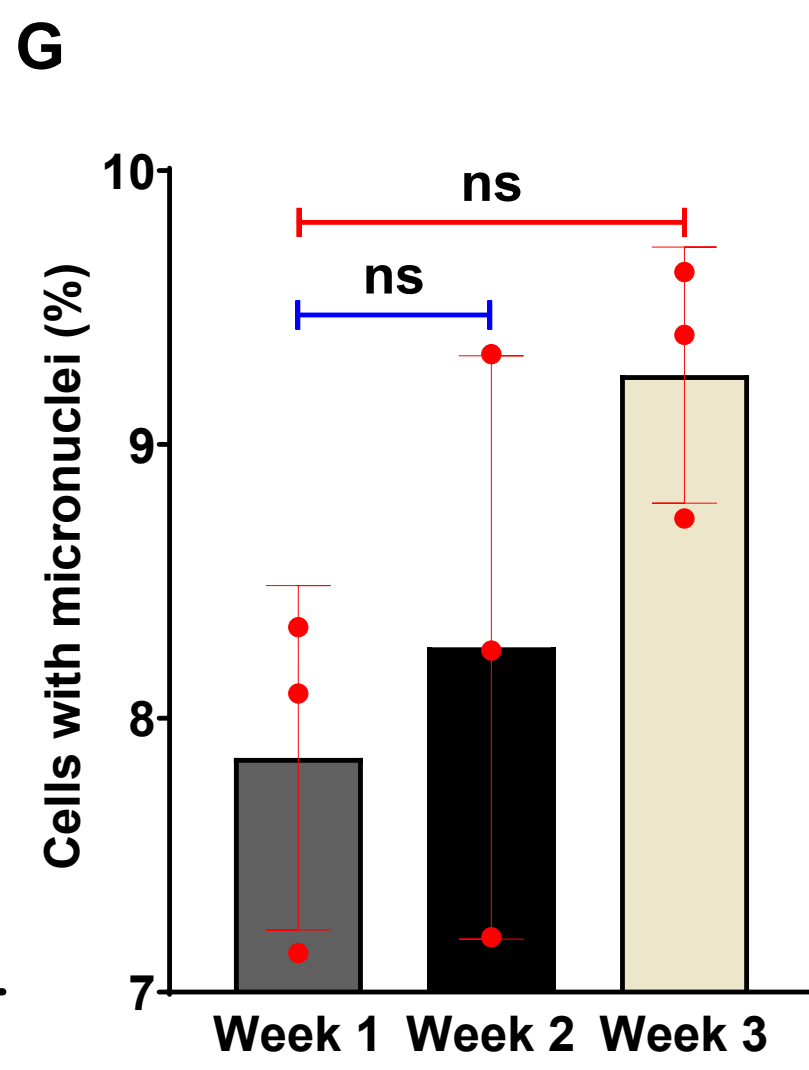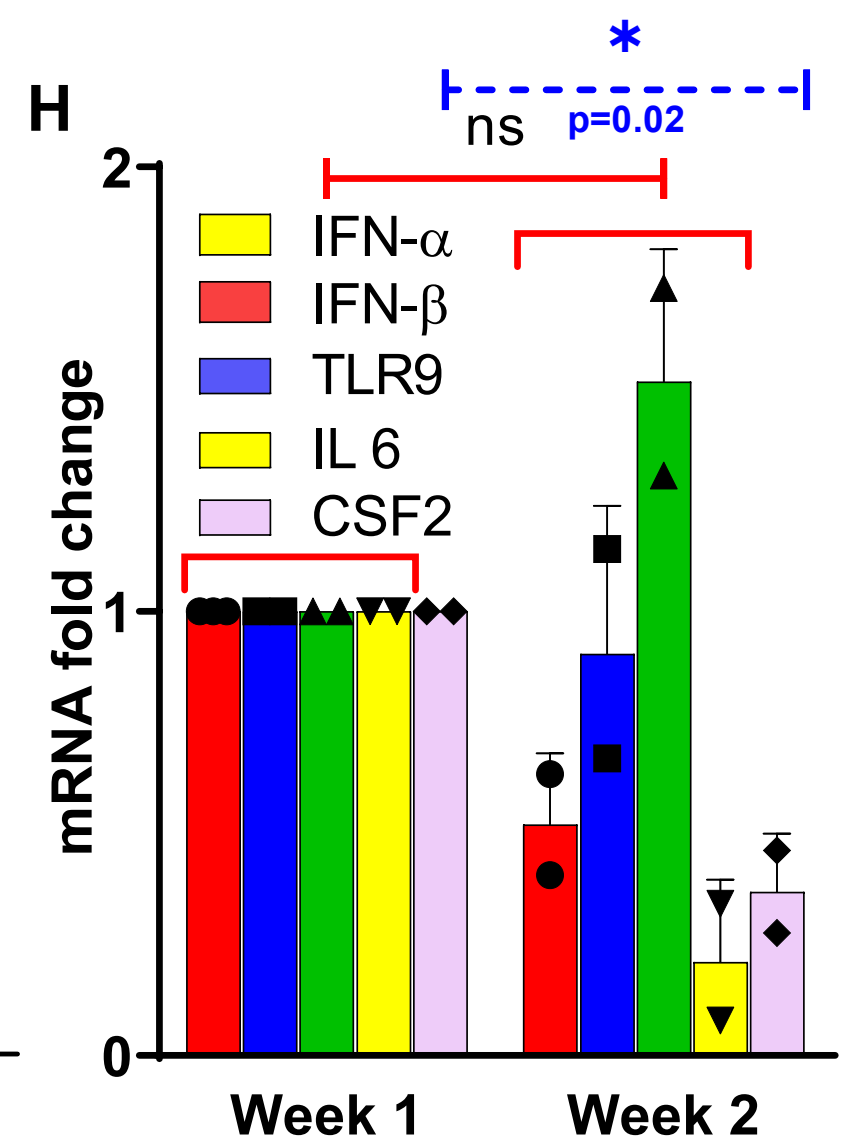

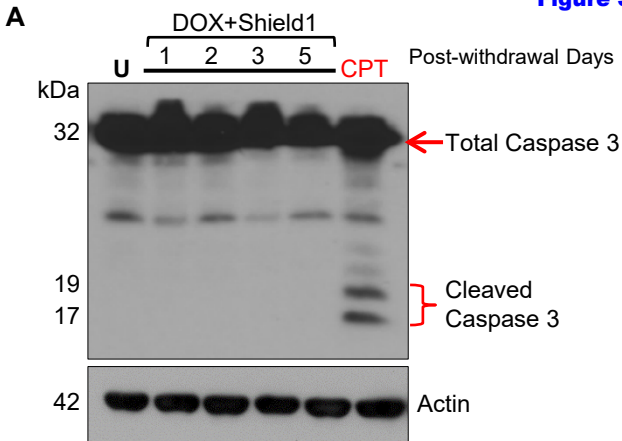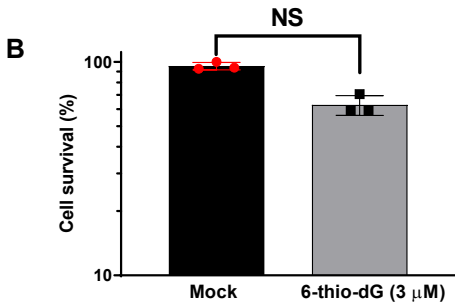

**Table S1**

| <b>Serial #</b> | <b>Primer Name</b>     | <b>Sequence (5'-3')</b>                                                                                            |
|-----------------|------------------------|--------------------------------------------------------------------------------------------------------------------|
| <b>1</b>        | TRF2-Nhe1-F            | GCTAGC <b>GCTAGC</b> <b>CCACC</b> ATG GCG GGA GGA GCGGG                                                            |
| <b>2</b>        | TRF2-Flag-Sall-R       | GTCGAC <b>GTCGAC</b> TTA <b>AGATCCCTTGTGTCATCGTCCTTGTAGTCCTTGTGTCATCGTCCTTGTAGTC</b> GTTCATGCCAAGTCTTTTCATGG       |
| <b>3</b>        | TRF2-45AA_Nhe1-F       | <b>GCTAGCGCTAGCCACCATG</b> GCACGGCTGGAAGAGG                                                                        |
| <b>4</b>        | TRF2-453AA_Flag-Sall-R | GTCGAC <b>GTCGAC</b> TTA AGATCCCTTGTGTCATCGTCCTTGTAGTCCTTGTGTCATCGTCCTTGTAGTCGTT <b>TTCTACAGTCCACTTCTGCTTTTTTG</b> |
| <b>7</b>        | DD-Nhe1-F              | CGATGT <b>GCTAGC</b> ATGGGAGTGCAGG                                                                                 |
| <b>8</b>        | DD-Nhe1-XhoI-R         | CGCGCG <b>GCTAGC</b> CTC GAG TTC CGG TTT TAGAAGCTCC                                                                |

**Table S2**

| <b>Sl. No.</b> | <b>Primary Antibodies</b>                                  | <b>Catalog #</b> | <b>Vendor</b>             | <b>Application (dilution)</b> |
|----------------|------------------------------------------------------------|------------------|---------------------------|-------------------------------|
| 1              | Mouse monoclonal anti-TRF2                                 | 100-56506        | Novus Bio                 | WB (1:500)                    |
| 2              | Rabbit polyclonal anti-STING                               | 24683            | Novus Bio                 | WB (1:500)                    |
| 3              | Rabbit polyclonal anti-TRF2                                | NA               | gift from Karlsensder lab | IF (1:100)                    |
| 4              | Mouse monoclonal anti-FLAG                                 | F3165            | Sigma                     | WB (1:2000); IF (1:500)       |
| 5              | Mouse monoclonal anti- $\gamma$ -Tubulin (GTu88)           | T6557            | Sigma                     | WB (1:50000)                  |
| 6              | Rabbit polyclonal anti-phospho STING (Ser366)              | 85735            | Cell Signaling            | WB (1:700)                    |
| 7              | Rabbit monoclonal anti-phospho-IRF3 (Ser396;4D4G)          | 4947             | Cell Signaling            | WB (1:500)                    |
| 8              | Rabbit monoclonal anti-phospho-TBK1 (Ser172;D52C2)         | 5483             | Cell Signaling            | WB (1:500)                    |
| 9              | Rabbit polyclonal anti-phospho-CHK1 (Ser317)               | 2344             | Cell Signaling            | WB (1:1000)                   |
| 10             | Rabbit monoclonal anti-phospho-Histone H2AX (Ser139;20E3)  | 9718             | Cell Signaling            | IF (1:1000)                   |
| 11             | Rabbit polyclonal anti-phospho-CHK2 (Thr68)                | 2661             | Cell Signaling            | WB (1:1000)                   |
| 12             | Rabbit monoclonal anti-cGAS (D1D3G)                        | 15102            | Cell Signaling            | WB (1:200); IF (1:100)        |
| 13             | Rabbit monoclonal anti-caspase-3 (8G10)                    | 9665             | Cell Signaling            | WB (1:500)                    |
| 14             | Rabbit polyclonal anti-phospho-ATM (Ser1981; EP1890Y)      | 81292            | Abcam                     | WB (1:10000); IF (1:500)      |
| 15             | Mouse monoclonal anti-phospho Stat1 p84/p91 (PSM1)         | 51700            | Santacruz                 | WB (1:200)                    |
| 16             | Mouse monoclonal anti-Lamin A/C (636)                      | 7292             | Santacruz                 | IF (1:300)                    |
| 17             | Mouse monoclonal anti-ATM (2C1)                            | 70103            | Gentex                    | WB (1:5000)                   |
| 18             | Mouse monoclonal anti-phospho-Histone H2AX (Ser139; JBW30) | 05-636           | Millipore                 | IF (1:1000)                   |
| 19             | Rabbit monoclonal anti-DNA-PKcs (Phospho S2056)            | 18192            | Abcam                     | IF (1:400)                    |
| 20             | Mouse monoclonal anti-KU80                                 | NA               | homemade                  | WB (1:1000)                   |
| 21             | Rabbit polyclonal anti-phospho-Histone H3 (Ser10)          | 06-570           | Millipore                 | IF (1:100)                    |
| 22             | Rabbit polyclonal anti-phospho-KAP1 (Ser824)               | A300-767A        | Bethyl                    | WB (1:5000)                   |



**Table S3**

| <b>Serial #</b> | <b>Primer Name</b>               | <b>Sequence (5'-3')</b>  |
|-----------------|----------------------------------|--------------------------|
| 1               | human IFN $\alpha$ Fwd (5'-3')   | AACTCCCCTGATGAATGCGG     |
| 2               | human IFN $\alpha$ Rev (5'-3')   | TAGCAGGGGTGAGAGTCTTTG    |
| 3               | human IFN $\beta$ Fwd (5'-3')    | CAACTTGCTTGGATTCTACAAAG  |
| 4               | human IFN $\beta$ Rev (5'-3')    | TATTCAAGCCTCCCATTCAATTG  |
| 5               | human TLR9 Fwd (5'-3')           | CGCCCTGCACCCGCTGTCTCT    |
| 6               | human TLR9 Rev (5'-3')           | CGGGGTGCTGCCATGGAGAAG    |
| 7               | human CCL5 Fwd (5'-3')           | CCAGCAGTCGTCTTTGTCAC     |
| 8               | human CCL5 Rev (5'-3')           | CTCTGGGTTGGCACACACTT     |
| 9               | human CXCL10 Fwd (5'-3')         | AGGAACCTCCAGTCTCAGCA     |
| 10              | human CXCL10 Rev (5'-3')         | CAAATTGGCTTGCAGGAAT      |
| 11              | human IFIT1 Fwd (5'-3')          | CCTCCTTGGGTTTCGTCTACA    |
| 12              | human IFIT1 Rev (5'-3')          | GGCTGATATCTGGGTGCCTA     |
| 13              | human IFIT3 Fwd (5'-3')          | GAAGGAACTGGGCCGCCTGCTAAG |
| 14              | human IFIT3 Rev (5'-3')          | GCCCTGGCCATTTCTCACTACC   |
| 15              | human ISG56 Fwd (5'-3')          | TTGATGACGATGAAATGCCTGA   |
| 16              | human ISG56 Rev (5'-3')          | CAGGTCACCAGACTCCTCAC     |
| 17              | human ISG54 Fwd (5'-3')          | AAGCACCTCAAAGGGCAAAC     |
| 18              | human ISG54 Rev (5'-3')          | TCGGCCCATGTGATAGTAGAC    |
| 19              | human IL6 Fwd (5'-3')            | CCTTCGGTCCAGTTGCCTTCT    |
| 20              | human IL6 Rev (5'-3')            | GCATTTGTGGTTGGGTCA       |
| 21              | human CSF2 Fwd (5'-3')           | AGCATGTGAATGCCATCCAG     |
| 22              | human CSF2 Rev (5'-3')           | AGGGGATGACAAGCAGAAAG     |
| 23              | human $\beta$ -Actin Fwd (5'-3') | TCGTGACAACGGCTCCGGCATGT  |
| 24              | human $\beta$ -Actin Rev (5'-3') | CCAGCCAGGTCCAGACGCAGGAT  |
